# Supplementary material
Source: PubMed Central journal article supplement (PMC2948789)
Supplement: mmc1.pdf [file mmc1.pdf]

The American Journal of Human Genetics, Volume 87

## **Supplemental Data**

### **A Mutation in *SLC24A1***

#### **Implicated in Autosomal-Recessive**

#### **Congenital Stationary Night Blindness**

S. Amer Riazuddin, Amber Shahzadi, Christina Zeitz, Zubair M. Ahmed, Radha Ayyagari, Venkata R. M. Chavali, Virgilio G. Ponferrada, Isabelle Audo, Christelle Michiels, Marie-Elise Lancelot, Idrees A. Nasir, Ahmad U. Zafar, Shaheen N. Khan, Tayyab Husnain, Xiaodong Jiao, Ian M. MacDonald, Sheikh Riazuddin, Paul A. Sieving, Nicholas Katsanis, and J. Fielding Hejtmancik

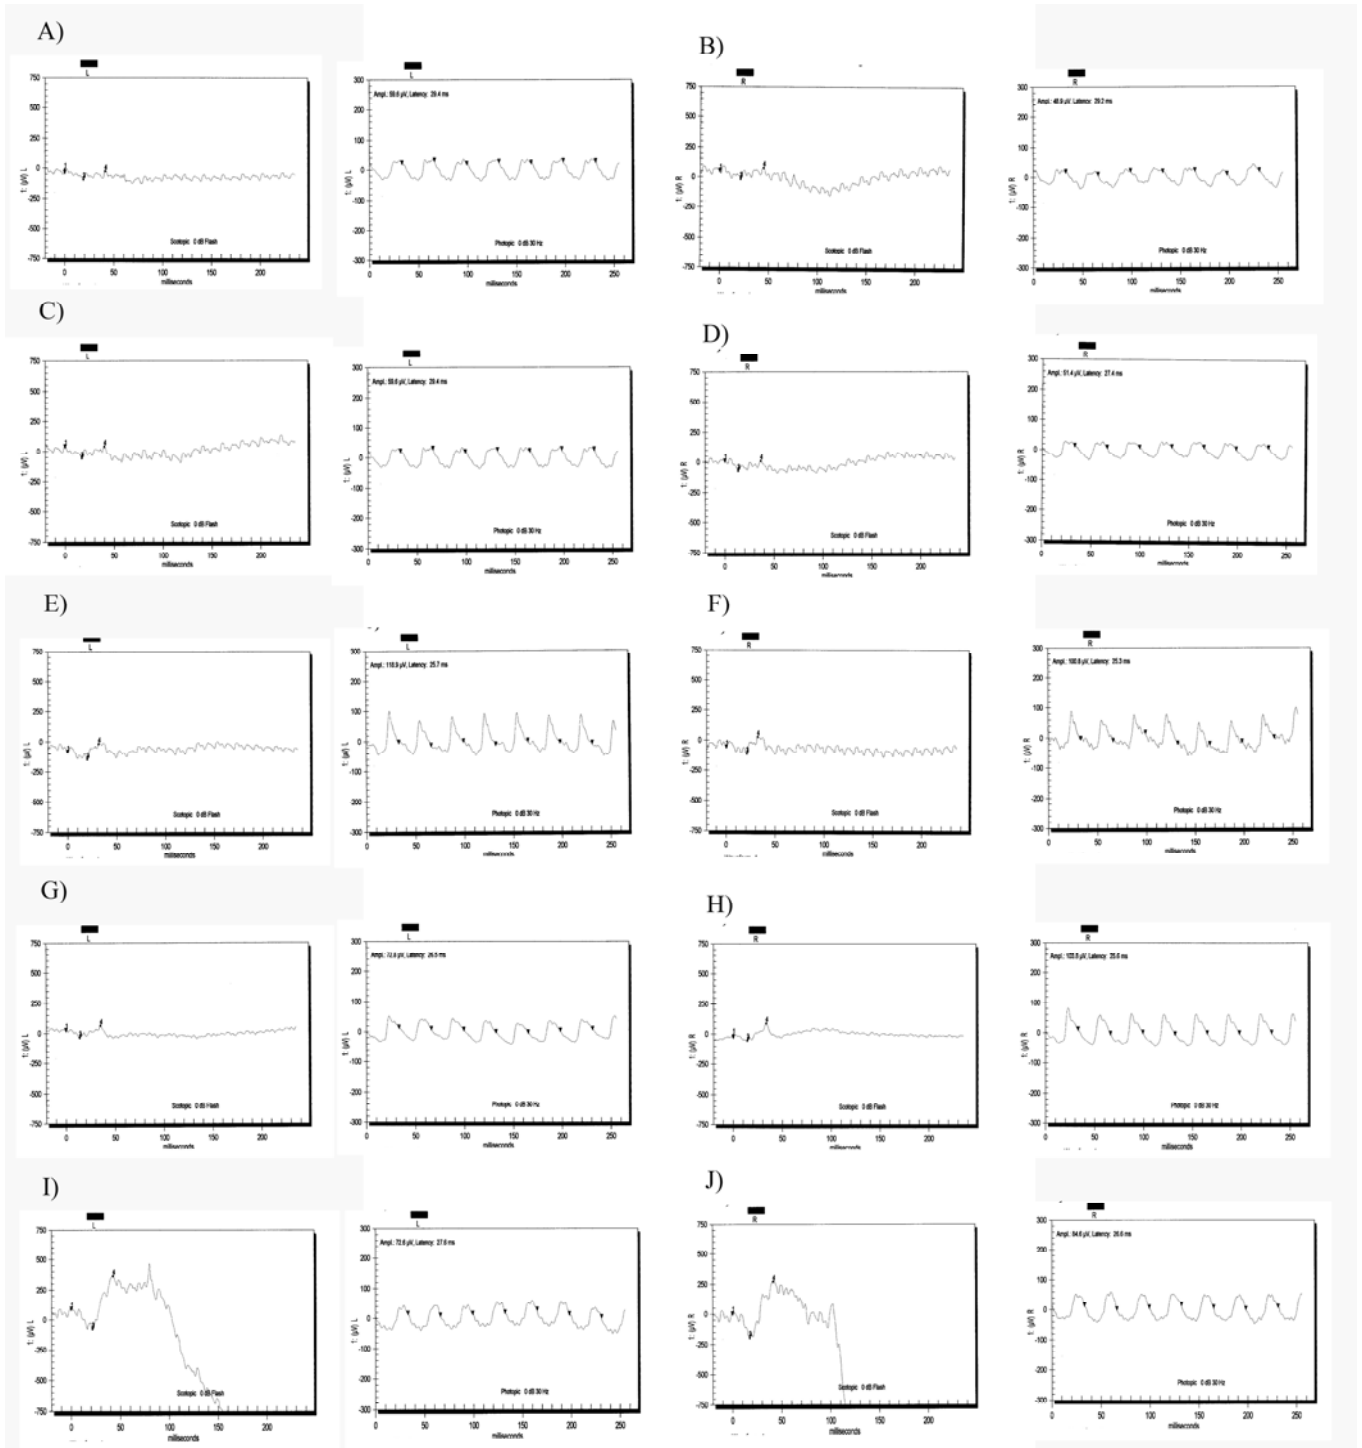

**Figure S1. Combined Rod and Cone Response Recorded at 0 db and Cone Responses Recorded with 30Hz Flicker ERG**

Affected individual 14 of family PKRP070: A) OS and B) OD; affected individual 18: C) OS and D) OD; affected individual 28: E) OS and F) OD; affected individual 34: G) OS and H) OD; and unaffected individual 35: I) OS and J) OD; respectively. All four affected individuals show reduced amplitude and shortened implicit times to white flashes suggesting absence of rod function, whereas the unaffected individual reveals normal rod response in both eyes. OD: Oculus Dexter (right eye); and OS: Oculus Sinister (left eye).

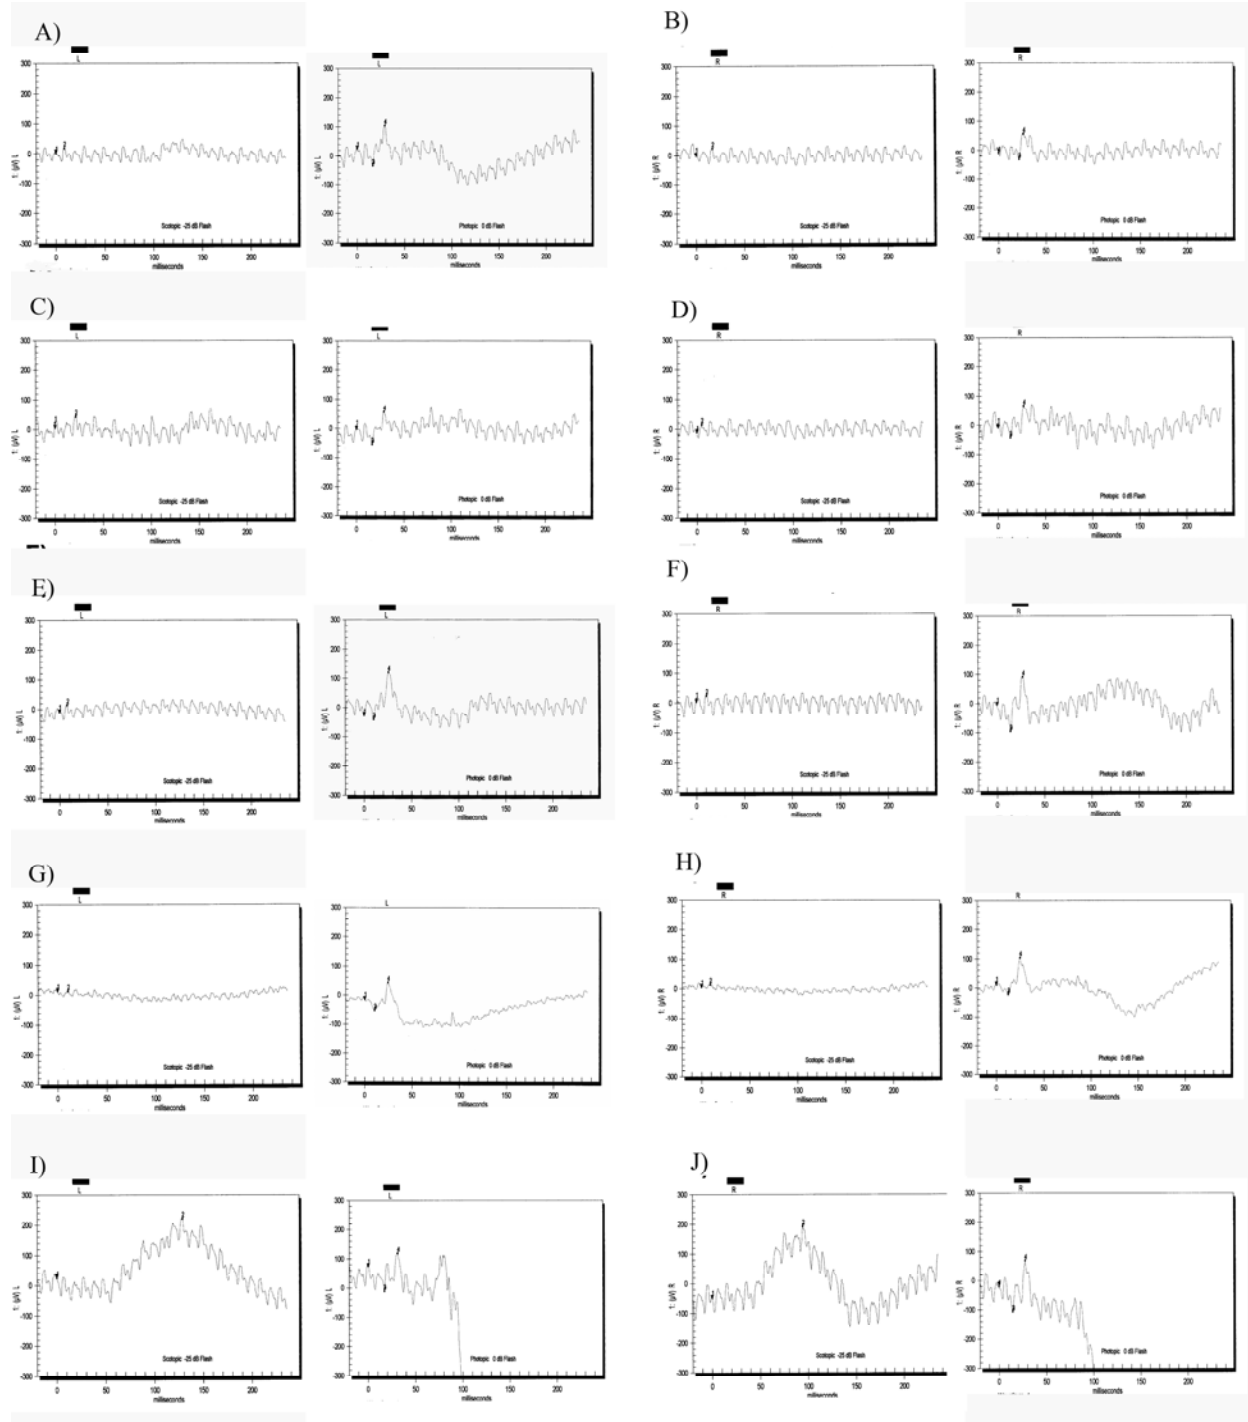

**Figure S2. Scotopic and Photopic ERG Recordings at -25 db after Four Hours after Dark Adaptation and 0 db, Respectively**

Affected individual 14 of family PKRP070: A) OS and B) OD; affected individual 18: C) OS and D) OD; affected individual 28: E) OS and F) OD; affected individual 34: G) OS and H) OD; and unaffected individual 35: I) OS and J) OD. All four affected individuals show no rod and reduced cone response, whereas the unaffected individual reveals normal rod and cone response in both eyes. OD and OS are as described in supplementary figure 1.

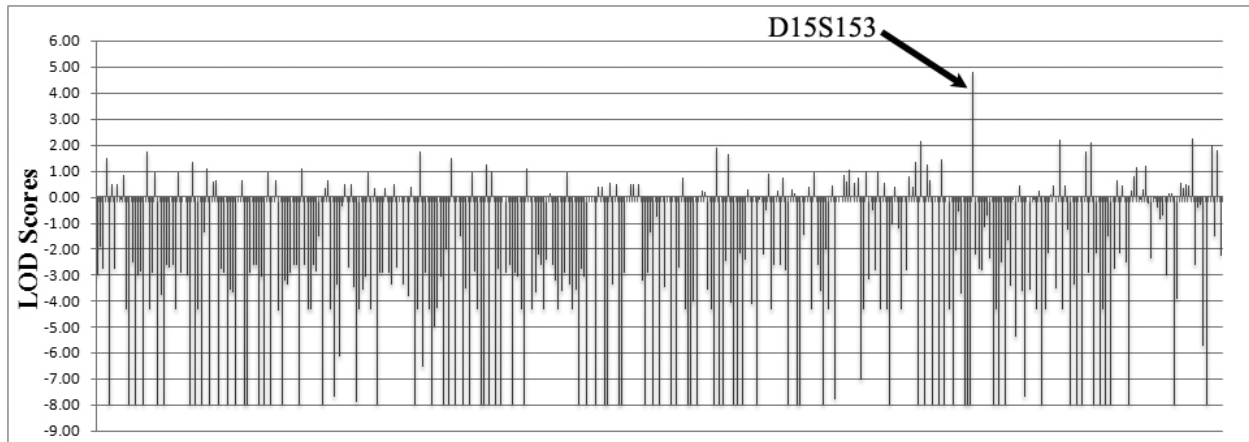

**Figure S3. Graphical Illustration of the Two-Point LOD Scores Obtained during the Genome-wide Scan of Family PKRP070**

Note: A two point LOD scores of -8 represents  $-\infty$ .
